# Supplementary material
Source: publisher figshare collection journal article supplement (https://scielo.figshare.com/articles/dataset/_/6503045)
Supplement: Supplementary file 1 [file Table_1.xls]

## Sheet: Table_1
<b>Authors (Year)</b>	<b>Explicit equation of the f</b>	<b>Applicable ranges</b>	<b>Equation number</b>
<a href="#B25">Moody (1947)</a>	<math><mi>f</mi><mo>=</mo><mn>0</mn><mo>.</mo><mn>0055</mn><mfenced><mrow><mn>1</mn><mo>+</mo><msup><mfenced><mrow><mn>2</mn><mo>&#215;</mo><msup><mn>10</mn><mn>4</mn></msup><mfrac><mi>&#949;</mi><mi>D</mi></mfrac><mo>+</mo><mfrac><msup><mn>10</mn><mn>6</mn></msup><mrow><mi>R</mi><mi>e</mi></mrow></mfrac></mrow></mfenced><mrow><mn>1</mn><mo>/</mo><mn>3</mn></mrow></msup></mrow></mfenced></math>	4 × 10<sup>3</sup> ≤ Re ≤ 10<sup>8</sup><br>0 &#8804; &#400;/D &#8804; 10<sup>-2</sup>	(2)
<a href="#B42">Wood (1966)</a>	<math><mi>f</mi><mo>=</mo><mn>0</mn><mo>.</mo><mn>094</mn><msup><mfenced><mfrac><mi>&#949;</mi><mi>D</mi></mfrac></mfenced><mrow><mn>0</mn><mo>.</mo><mn>225</mn></mrow></msup><mo>+</mo><mn>0</mn><mo>.</mo><mn>53</mn><mfenced><mfrac><mi>&#949;</mi><mi>D</mi></mfrac></mfenced><mo>+</mo><mn>88</mn><msup><mfenced><mfrac><mi>&#949;</mi><mi>D</mi></mfrac></mfenced><mrow><mn>0</mn><mo>.</mo><mn>44</mn><…	4 × 10<sup>3</sup> ≤ Re ≤ 5 × 10<sup>7</sup><br>10<sup>-5</sup> ≤ Ɛ/D ≤ 4 × 10<sup>-2</sup>	(3)
<a href="#B13">Churchill (1973)</a>	<math><mfrac><mn>1</mn><msqrt><mi>f</mi></msqrt></mfrac><mo>=</mo><mo>-</mo><mn>2</mn><mi>log</mi><mfenced><mrow><mfrac><mi>&#949;</mi><mrow><mn>3</mn><mo>.</mo><mn>71</mn><mi>D</mi></mrow></mfrac><mo>+</mo><msup><mfenced><mfrac><mn>7</mn><mrow><mi>R</mi><mi>e</mi></mrow></mfrac></mfenced><mrow><mn>0</mn><mo>.</mo><mn>9</mn></mrow></msup></mrow></mfenced></math>	Not specified	(4)
<a href="#B16">Eck (1973)</a>	<math><mfrac><mn>1</mn><msqrt><mi>f</mi></msqrt></mfrac><mo>=</mo><mo>-</mo><mn>2</mn><mi>log</mi><mfenced><mrow><mfrac><mstyle><mi>&#949;</mi></mstyle><mstyle><mn>3</mn><mo>.</mo><mn>71</mn><mi>D</mi></mstyle></mfrac><mo>+</mo><mfrac><mn>15</mn><mrow><mi>R</mi><mi>e</mi></mrow></mfrac></mrow></mfenced></math>	0 ≤ Ɛ/D ≤ 10<sup>-2</sup>	(5)
<a href="#B21">Jain (1976)</a>	<math><mfrac><mn>1</mn><msqrt><mi>f</mi></msqrt></mfrac><mo>=</mo><mo>-</mo><mn>2</mn><mi>log</mi><mfenced><mrow><mfrac><mi>&#949;</mi><mrow><mn>3</mn><mo>.</mo><mn>715</mn><mi>D</mi></mrow></mfrac><mo>+</mo><msup><mfenced><mfrac><mrow><mn>6</mn><mo>.</mo><mn>943</mn></mrow><mrow><mi>R</mi><mi>e</mi></mrow></mfrac></mfenced><mrow><mn>0</mn><mo>.</mo><mn>9</mn></mrow></msup></mrow></mfenced></math>	5 × 10<sup>3</sup> ≤ Re ≤ 10<sup>7</sup>	(6)
<a href="#B37">Swamee &amp; Jain (1976)</a>	<math><mfrac><mn>1</mn><msqrt><mi>f</mi></msqrt></mfrac><mo>=</mo><mo>-</mo><mn>2</mn><mi>log</mi><mfenced><mrow><mfrac><mstyle><mi>&#949;</mi></mstyle><mstyle><mn>3</mn><mo>.</mo><mn>7</mn><mi>D</mi></mstyle></mfrac><mo>+</mo><mfrac><mstyle><mn>5</mn><mo>.</mo><mn>74</mn></mstyle><mstyle><mi>R</mi><msup><mi>e</mi><mrow><mn>0</mn><mo>.</mo><mn>9</mn></mrow></msup></mstyle></mfrac></mrow></mfenced…	5 × 10<sup>3</sup> ≤ Re ≤ 10<sup>8</sup><br>10<sup>-6</sup> ≤ Ɛ/D ≤ 5 × 10<sup>-2</sup>	(7)
<a href="#B12">Chen (1979)</a>	<math><mfrac><mn>1</mn><msqrt><mi>f</mi></msqrt></mfrac><mo>=</mo><mo>-</mo><mn>2</mn><mi>log</mi><mfenced><mrow><mfrac><mi>&#949;</mi><mrow><mn>3</mn><mo>.</mo><mn>7065</mn><mi>D</mi></mrow></mfrac><mo>-</mo><mfrac><mrow><mn>5</mn><mo>.</mo><mn>0452</mn></mrow><mrow><mi>R</mi><mi>e</mi></mrow></mfrac><mi>log</mi><mfenced><mrow><mfrac><mn>1</mn><mrow><mn>2</mn><mo>.</mo><mn>8257</mn></mrow></mfra…	4 × 10<sup>3</sup> ≤ Re ≤ 4 × 10<sup>8</sup><br>10<sup>-7</sup> ≤ Ɛ/D ≤ 5 × 10<sup>-2</sup>	(8)
<a href="#B31">Round (1980)</a>	<math><mfrac><mn>1</mn><msqrt><mi>f</mi></msqrt></mfrac><mo>=</mo><mn>1</mn><mo>.</mo><mn>8</mn><mi>log</mi><mfenced><mfrac><mrow><mi>R</mi><mi>e</mi></mrow><mrow><mn>0</mn><mo>.</mo><mn>135</mn><mi>R</mi><mi>e</mi><mfenced><mstyle><mfrac><mi>&#949;</mi><mi>D</mi></mfrac></mstyle></mfenced><mo>+</mo><mn>6</mn><mo>.</mo><mn>5</mn></mrow></mfrac></mfenced></math>	4 × 10<sup>3</sup> ≤ Re ≤ 10<sup>8</sup><br>0 &#8804; &#400;/D &#8804; 5 &#215; 10<sup>-2</sup>	(9)
<a href="#B33">Shacham (1980)</a>	<math><mfrac><mn>1</mn><msqrt><mi>f</mi></msqrt></mfrac><mo>=</mo><mo>-</mo><mn>2</mn><mi>log</mi><mfenced><mrow><mfrac><mi>&#949;</mi><mrow><mn>3</mn><mo>.</mo><mn>7</mn><mi>D</mi></mrow></mfrac><mo>-</mo><mfrac><mrow><mn>5</mn><mo>.</mo><mn>02</mn></mrow><mrow><mi>R</mi><mi>e</mi></mrow></mfrac><mi>log</mi><mfenced><mrow><mfrac><mi>&#949;</mi><mrow><mn>3</mn><mo>.</mo><mn>7</mn><mi>D</mi></mrow…	4 × 10<sup>3</sup> ≤ Re ≤ 4 × 10<sup>8</sup>	(10)
<a href="#B4">Barr (1981)</a>	<math><mfrac><mn>1</mn><msqrt><mi>f</mi></msqrt></mfrac><mo>=</mo><mo>-</mo><mn>2</mn><mi>log</mi><mfenced><mrow><mfrac><mi>&#949;</mi><mrow><mn>3</mn><mo>.</mo><mn>7</mn><mi>D</mi></mrow></mfrac><mo>+</mo><mfrac><mrow><mn>4</mn><mo>.</mo><mn>518</mn><mi>log</mi><mfenced><mstyle><mfrac><mrow><mi>R</mi><mi>e</mi></mrow><mn>7</mn></mfrac></mstyle></mfenced></mrow><mrow><mi>R</mi><mi>e</mi><mfenced>…	Not specified	(11)
<a href="#B43">Zigrang &amp; Sylvester (1982)</a>	<math><mfrac><mn>1</mn><msqrt><mi>f</mi></msqrt></mfrac><mo>=</mo><mo>-</mo><mn>2</mn><mi>log</mi><mfenced><mrow><mfrac><mi>&#949;</mi><mrow><mn>3</mn><mo>.</mo><mn>7</mn><mi>D</mi></mrow></mfrac><mo>-</mo><mfrac><mrow><mn>5</mn><mo>.</mo><mn>02</mn></mrow><mrow><mi>R</mi><mi>e</mi></mrow></mfrac><mi>log</mi><mfenced><mrow><mfrac><mstyle><mi>&#949;</mi></mstyle><mstyle><mn>3</mn><mo>.</mo><mn>7</…	4 × 10<sup>3</sup> ≤ Re ≤ 10<sup>8</sup><br>4 &#215; 10<sup>-5</sup> ≤ Ɛ/D ≤ 5 × 10<sup>-2</sup>	(12)
<a href="#B19">Haaland (1983)</a>	<math><mfrac><mn>1</mn><msqrt><mi>f</mi></msqrt></mfrac><mo>=</mo><mo>-</mo><mn>1</mn><mo>.</mo><mn>8</mn><mi>log</mi><mfenced><mrow><msup><mfenced><mfrac><mi>&#949;</mi><mrow><mn>3</mn><mo>.</mo><mn>7</mn><mi>D</mi></mrow></mfrac></mfenced><mrow><mn>1</mn><mo>.</mo><mn>11</mn></mrow></msup><mo>+</mo><mfrac><mrow><mn>6</mn><mo>.</mo><mn>9</mn></mrow><mrow><mi>R</mi><mi>e</mi></mrow></mfrac></mrow…	4 × 10<sup>3</sup> ≤ Re ≤ 10<sup>8</sup><br>10<sup>-6</sup> ≤ Ɛ/D ≤ 5 × 10<sup>-2</sup>	(13)
<a href="#B38">Tsal (1989)</a>	<math><mi>A</mi><mo>=</mo><mn>0</mn><mo>.</mo><mn>11</mn><msup><mfenced><mrow><mfrac><mn>68</mn><mrow><mi>R</mi><mi>e</mi></mrow></mfrac><mo>+</mo><mfrac><mi>&#949;</mi><mi>D</mi></mfrac></mrow></mfenced><mrow><mn>0</mn><mo>.</mo><mn>25</mn></mrow></msup></math> <br>If A &#8805; 0.018 than f = A<br>If A &lt; 0.018 than f = 0.0028 + 0.85A	4 × 10<sup>3</sup> ≤ Re ≤ 10<sup>8</sup><br>0 &#8804; &#400;/D &#8804; 5 &#215; 10<sup>-2</sup>	(14)
<a href="#B29">Robaina (1992)</a>	<math><mfrac><mn>1</mn><msqrt><mi>f</mi></msqrt></mfrac><mo>=</mo><mo>-</mo><mn>2</mn><mi>log</mi><mfenced><mrow><mn>0</mn><mo>.</mo><mn>27</mn><mfrac><mi>&#949;</mi><mi>D</mi></mfrac><mo>+</mo><mfrac><mrow><mn>5</mn><mo>.</mo><mn>62</mn></mrow><mrow><mi>R</mi><msup><mi>e</mi><mrow><mn>0</mn><mo>.</mo><mn>9</mn></mrow></msup></mrow></mfrac></mrow></mfenced></math>	4 × 10<sup>3</sup> ≤ Re ≤ 4 × 10<sup>7</sup><br>10<sup>-5</sup> ≤ Ɛ/D ≤ 10<sup>-2</sup>	(15)
<a href="#B22">Manadilli (1997)</a>	<math><mfrac><mn>1</mn><msqrt><mi>f</mi></msqrt></mfrac><mo>=</mo><mo>-</mo><mn>2</mn><mi>log</mi><mfenced><mrow><mfrac><mi>&#949;</mi><mi>D</mi></mfrac><mo>+</mo><mfrac><mn>95</mn><mrow><mi>R</mi><msup><mi>e</mi><mrow><mn>0</mn><mo>.</mo><mn>983</mn></mrow></msup></mrow></mfrac><mo>+</mo><mfrac><mrow><mn>96</mn><mo>.</mo><mn>82</mn></mrow><mrow><mi>R</mi><mi>e</mi></mrow></mfrac></mrow></mfenced…	5.235 × 10<sup>3</sup> ≤ Re ≤ 10<sup>8</sup><br>0 &#8804; &#400;/D &#8804; 5 &#215; 10<sup>-2</sup>	(16)
<a href="#B36">Sousa et al. (1999)</a>	<math><mfrac><mn>1</mn><msqrt><mi>f</mi></msqrt></mfrac><mo>=</mo><mo>-</mo><mn>2</mn><mi>log</mi><mfenced><mrow><mfrac><mi>&#949;</mi><mrow><mn>3</mn><mo>.</mo><mn>7</mn><mi>D</mi></mrow></mfrac><mo>-</mo><mfrac><mrow><mn>5</mn><mo>.</mo><mn>16</mn></mrow><mrow><mi>R</mi><mi>e</mi></mrow></mfrac><mi>log</mi><mfenced><mrow><mfrac><mi>&#949;</mi><mrow><mn>3</mn><mo>.</mo><mn>7</mn><mi>D</mi></mrow…	Not specified	(17)
<a href="#B30">Romeo et al. (2002)</a>	<math><mfrac><mn>1</mn><msqrt><mi>f</mi></msqrt></mfrac><mo>=</mo><mo>-</mo><mn>2</mn><mi>log</mi><mfenced><mrow><mfrac><mi>&#949;</mi><mrow><mn>3</mn><mo>.</mo><mn>7065</mn><mi>D</mi></mrow></mfrac><mo>-</mo><mfrac><mrow><mn>5</mn><mo>.</mo><mn>0272</mn></mrow><mrow><mi>R</mi><mi>e</mi></mrow></mfrac><mi>log</mi><mfenced><mrow><mfrac><mi>&#949;</mi><mrow><mn>3</mn><mo>.</mo><mn>827</mn><mi>D</mi…	3 × 10<sup>3</sup> ≤ Re ≤ 1.5 × 10<sup>8</sup><br>0 &#8804; &#400;/D &#8804; 5 &#215; 10<sup>-2</sup>	(18)
<a href="#B35">Sonnad &amp; Goudar (2006)</a>	<math><mfrac><mn>1</mn><msqrt><mi>f</mi></msqrt></mfrac><mo>=</mo><mn>0</mn><mo>.</mo><mn>8686</mn><mi>ln</mi><mfenced><mfrac><mrow><mn>0</mn><mo>.</mo><mn>4587</mn><mi>R</mi><mi>e</mi></mrow><msup><mi>G</mi><mstyle><mfrac><mi>G</mi><mrow><mi>G</mi><mo>+</mo><mn>1</mn></mrow></mfrac></mstyle></msup></mfrac></mfenced></math> <br> <math><mi>G</mi><mo>=</mo><mn>0</mn><mo>.</mo><mn>124</mn><mi>R</mi>…	4 × 10<sup>3</sup> ≤ Re ≤ 10<sup>8</sup><br>10<sup>-6</sup> ≤ Ɛ/D ≤ 5 × 10<sup>-2</sup>	(19)
<a href="#B28">Rao &amp; Kumar (2007)</a>	<math><mfrac><mn>1</mn><msqrt><mi>f</mi></msqrt></mfrac><mo>=</mo><mn>2</mn><mi>log</mi><mfenced><mfrac><mstyle><msup><mfenced><mrow><mn>2</mn><mstyle><mfrac><mi>&#949;</mi><mi>D</mi></mfrac></mstyle></mrow></mfenced><mrow><mo>-</mo><mn>1</mn></mrow></msup></mstyle><mrow><mfenced><mstyle><mfrac><mrow><mn>0</mn><mo>.</mo><mn>444</mn><mo>+</mo><mn>0</mn><mo>.</mo><mn>135</mn><mi>R</mi><mi>e</mi></m…	Not specified	(20)
<a href="#B10">Buzzelli (2008)</a>	<math><mfrac><mn>1</mn><msqrt><mi>f</mi></msqrt></mfrac><mo>=</mo><msub><mi>B</mi><mn>1</mn></msub><mo>-</mo><mfenced><mfrac><mrow><msub><mi>B</mi><mn>1</mn></msub><mo>+</mo><mn>2</mn><mi>log</mi><mfenced><mstyle><mfrac><msub><mi>B</mi><mn>2</mn></msub><mrow><mi>R</mi><mi>e</mi></mrow></mfrac></mstyle></mfenced></mrow><mrow><mn>1</mn><mo>+</mo><mstyle><mfrac><mrow><mn>2</mn><mo>.</mo><mn>18</mn><…	3 × 10<sup>3</sup> ≤ Re ≤ 1.5 × 10<sup>8</sup><br>0 &#8804; &#400;/D &#8804; 5 &#215; 10<sup>-2</sup>	(21)
<a href="#B39">Vantankhah &amp; Kouchakzadeh (2008)</a>	<math><mfrac><mn>1</mn><msqrt><mi>f</mi></msqrt></mfrac><mo>=</mo><mn>0</mn><mo>.</mo><mn>8686</mn><mi>ln</mi><mfenced><mfrac><mrow><mn>0</mn><mo>.</mo><mn>4587</mn><mi>R</mi><mi>e</mi></mrow><mstyle><msup><mfenced><mrow><mi>S</mi><mo>-</mo><mn>0</mn><mo>.</mo><mn>31</mn></mrow></mfenced><mfenced><mfrac><mi>S</mi><mrow><mi>S</mi><mo>+</mo><mn>0</mn><mo>.</mo><mn>9633</mn></mrow></mfrac></mfenced>…	4 × 10<sup>3</sup> ≤ Re ≤ 10<sup>8</sup><br>10<sup>-6</sup> ≤ Ɛ/D ≤ 5 × 10<sup>-2</sup>	(22)
<a href="#B2">Avci &amp; Karagoz (2009)</a>	<math><mi>f</mi><mo>=</mo><mfrac><mrow><mn>6</mn><mo>.</mo><mn>4</mn></mrow><mstyle><msup><mfenced><mrow><mi>ln</mi><mstyle><mfenced><mrow><mi>R</mi><mi>e</mi></mrow></mfenced></mstyle><mstyle><mo>-</mo></mstyle><mstyle><mi>ln</mi></mstyle><mstyle><mfenced><mrow><mn>1</mn><mo>+</mo><mn>0</mn><mo>.</mo><mn>01</mn><mi>R</mi><mi>e</mi><mfrac><mi>&#949;</mi><mi>D</mi></mfrac><mfenced><mrow><mn>1</mn>…	Not specified	(23)
<a href="#B27">Papaevangelou et al. (2010)</a>	<math><mi>f</mi><mo>=</mo><mfrac><mrow><mn>0</mn><mo>.</mo><mn>2479</mn><mo>-</mo><mn>0</mn><mo>.</mo><mn>0000947</mn><msup><mfenced><mrow><mn>7</mn><mo>-</mo><mi>log</mi><mi>R</mi><mi>e</mi></mrow></mfenced><mn>4</mn></msup></mrow><mstyle><msup><mfenced><mrow><mi>log</mi><mstyle><mfenced><mrow><mfrac><mi>&#949;</mi><mrow><mn>3</mn><mo>.</mo><mn>615</mn><mi>D</mi></mrow></mfrac><mo>+</mo><mfrac><…	10<sup>4</sup> ≤ Re ≤ 10<sup>7</sup><br>10<sup>-5</sup> ≤ Ɛ/D ≤ 10<sup>-3</sup>	(24)
<a href="#B5">Brki&#263; (2011a)</a>	<math><mfrac><mn>1</mn><msqrt><mi>f</mi></msqrt></mfrac><mo>=</mo><mo>-</mo><mn>2</mn><mi>log</mi><mfenced><mrow><mfrac><mrow><mn>2</mn><mo>.</mo><mn>18</mn><mi>&#946;</mi></mrow><mrow><mi>R</mi><mi>e</mi></mrow></mfrac><mo>+</mo><mfrac><mi>&#949;</mi><mrow><mn>3</mn><mo>.</mo><mn>71</mn><mi>D</mi></mrow></mfrac></mrow></mfenced></math> <br> <math><mi>&#946;</mi><mo>=</mo><mi>ln</mi><mfrac><mrow>…	Not specified	(25)
<a href="#B17">Fang et al. (2011)</a>	<math><mi>f</mi><mo>=</mo><mn>1</mn><mo>.</mo><mn>613</mn><msup><mfenced><mrow><mi>ln</mi><mfenced><mrow><mn>0</mn><mo>.</mo><mn>234</mn><msup><mfenced><mfrac><mi>&#949;</mi><mi>D</mi></mfrac></mfenced><mrow><mn>1</mn><mo>.</mo><mn>1007</mn></mrow></msup><mo>-</mo><mfrac><mrow><mn>60</mn><mo>.</mo><mn>525</mn></mrow><mrow><mi>R</mi><msup><mi>e</mi><mrow><mn>1</mn><mo>.</mo><mn>1105</mn></mrow></m…	3 × 10<sup>3</sup> ≤ Re ≤ 10<sup>8</sup><br>0 &#8804; &#400;/D &#8804; 5 &#215; 10<sup>-2</sup>	(26)
<a href="#B18">Ghanbari et al. (2011)</a>	<math><mi>f</mi><mo>=</mo><msup><mfenced><mrow><mo>-</mo><mn>1</mn><mo>.</mo><mn>52</mn><mi>log</mi><mfenced><mrow><msup><mfenced><mfrac><mi>&#949;</mi><mrow><mn>7</mn><mo>.</mo><mn>21</mn><mi>D</mi></mrow></mfrac></mfenced><mrow><mn>1</mn><mo>.</mo><mn>042</mn></mrow></msup><mo>+</mo><msup><mfenced><mfrac><mrow><mn>2</mn><mo>.</mo><mn>731</mn></mrow><mrow><mi>R</mi><mi>e</mi></mrow></mfrac></mfe…	2.1 × 10<sup>3</sup> ≤ Re ≤ 10<sup>8</sup><br>0 &#8804; &#400;/D &#8804; 5 &#215; 10<sup>-2</sup>	(27)
<a href="#B34">Shaikh et al. (2015)</a>	<math><mi>f</mi><mo>=</mo><mn>0</mn><mo>.</mo><mn>25</mn><msup><mfenced><mrow><mi>log</mi><mfenced><mrow><mfrac><mrow><mn>2</mn><mo>.</mo><mn>51</mn></mrow><mrow><mi>&#945;</mi><mi>R</mi><mi>e</mi></mrow></mfrac><mo>+</mo><mfrac><mi>&#949;</mi><mrow><mn>3</mn><mo>.</mo><mn>7</mn><mi>D</mi></mrow></mfrac></mrow></mfenced></mrow></mfenced><mrow><mo>-</mo><mn>2</mn></mrow></msup></math> <br> <math><…	10<sup>4</sup> ≤ Re ≤ 10<sup>8</sup><br>10<sup>-4</sup> ≤ Ɛ/D ≤ 5 × 10<sup>-2</sup>	(28)
<a href="#B7">Brki&#263; (2016)</a>	<math><mfrac><mn>1</mn><msqrt><mi>f</mi></msqrt></mfrac><mo>=</mo><mo>-</mo><mn>2</mn><mi>log</mi><mfenced><mrow><mfrac><mrow><mn>2</mn><mo>.</mo><mn>51</mn><mfenced><mrow><mn>1</mn><mo>.</mo><mn>14</mn><mo>-</mo><mn>2</mn><mi>log</mi><mfenced><mstyle><mfrac><mi>&#949;</mi><mi>D</mi></mfrac></mstyle></mfenced></mrow></mfenced></mrow><mrow><mi>R</mi><mi>e</mi></mrow></mfrac><mo>+</mo><mfrac><mi>&#…	10<sup>6</sup> < Re < 10<sup>8</sup><br>10<sup>-2</sup> < Ɛ/D < 5 × 10<sup>-2</sup>	(29)
<a href="#B26">Offor &amp; Alabi (2016)</a>	<math><mfrac><mn>1</mn><msqrt><mi>f</mi></msqrt></mfrac><mo>=</mo><mo>-</mo><mn>2</mn><mi>log</mi><mfenced><mrow><mfrac><mi>&#949;</mi><mrow><mn>3</mn><mo>.</mo><mn>71</mn><mi>D</mi></mrow></mfrac><mo>-</mo><mfrac><mrow><mn>1</mn><mo>.</mo><mn>975</mn></mrow><mrow><mi>R</mi><mi>e</mi></mrow></mfrac><mfenced><mrow><mi>ln</mi><mfenced><mrow><msup><mfenced><mfrac><mi>&#949;</mi><mrow><mn>3</mn><mo>.…	4 × 10<sup>3</sup> ≤ Re ≤ 10<sup>8</sup><br>0 &#8804; &#400;/D &#8804; 5 &#215; 10<sup>-2</sup>	(30)
