# Supplementary material
Source: publisher figshare collection journal article supplement (https://scielo.figshare.com/articles/dataset/_/6503045)
Supplement: Supplementary file 2 [file Table_2.xls]

## Sheet: Table_2
<b>Concordance index (d)</b>	<b>Correlation coefficient (r)</b>	<b>Performance index (Id)</b>	<b>Classification</b>
0.95-1.00	0.95-1.00	0.90-1.00	Excellent
0.89-0.95	0.89-0.95	0.80-0.90	Optimum
0.84-0.89	0.84-0.89	0.70-0.80	Very Good
0.77-0.84	0.77-0.84	0.60-0.70	Good
0.71-0.77	0.71-0.77	0.50-0.60	Moderately Good
0.63-0.71	0.63-0.71	0.40-0.50	Moderate
0.55-0.63	0.55-0.63	0.30-0.40	Moderately Poor
0.45-0.55	0.45-0.55	0.20-0.30	Poor
0.32-0.45	0.32-0.45	0.10-0.20	Very Poor
0.00-0.32	0.00-0.32	0.00-0.10	Bad
